# Supplementary material
Source: PubMed Central journal article supplement (PMC2758722)
Supplement: jc.2009-0417_1.pdf [file jc.2009-0417_1.pdf]

Supplemental Table 1. Definition of frailty in the Osteoporotic Fractures in Men (MrOS) Study.

| Characteristic             | Definition                                                                                                                                                                                                                                                                                                                                                                                                                                                                                                                 |
|----------------------------|----------------------------------------------------------------------------------------------------------------------------------------------------------------------------------------------------------------------------------------------------------------------------------------------------------------------------------------------------------------------------------------------------------------------------------------------------------------------------------------------------------------------------|
| Shrinking; sarcopenia      | Lowest 20% of appendicular lean mass, adjusted for height and total body fat*                                                                                                                                                                                                                                                                                                                                                                                                                                              |
| Weakness                   | Weakest 20% of grip strength, stratified by body mass index (BMI): <ul style="list-style-type: none"> <li>○ Grip strength &lt; 32 kg for BMI quartile 1 (BMI &lt; 24.8 kg/m<sup>2</sup>)</li> <li>○ Grip strength &lt; 34 kg for BMI quartile 2 (24.8 kg/m<sup>2</sup> ≤ BMI &lt; 27.0 kg/m<sup>2</sup>)</li> <li>○ Grip strength &lt; 36 kg for BMI quartile 3 (27.0 kg/m<sup>2</sup> ≤ BMI &lt; 29.4 kg/m<sup>2</sup>)</li> <li>○ Grip strength &lt; 36 kg for BMI quartile 4 (BMI ≥ 29.4.0 kg/m<sup>2</sup>)</li> </ul> |
| Poor endurance; exhaustion | Exhaustion: self-report from question on SF-12:† <ul style="list-style-type: none"> <li>○ How much of the time during the past four weeks did you have a lot of energy? (A little/none of the time = exhaustion)</li> </ul>                                                                                                                                                                                                                                                                                                |
| Slowness                   | Slowest 20% in walking speed over a 6 m course, stratified by height: <ul style="list-style-type: none"> <li>○ Walking speed ≤0.99 m/s or unable for height ≤ 174.4 cm</li> <li>○ Walking speed ≤1.06 m/s or unable for height &gt;174.4 cm</li> </ul>                                                                                                                                                                                                                                                                     |
| Low activity               | Lowest 20% of PASE score‡ (score <88.4, range 0 – 486)                                                                                                                                                                                                                                                                                                                                                                                                                                                                     |

\* Lowest 20% of residuals from regression of appendicular skeletal mass on height and total body fat.

† SF-12: Medical Outcomes Survey Short Form, 12 item questionnaire

‡ Physical Activity Scale for the Elderly, higher scores indicate higher activity level
